# Supplementary material
Source: PubMed Central journal article supplement (PMC2602890)
Supplement: M806809200_1.pdf [file M806809200_1.pdf]

## SUPPORTING INFORMATION

### DNA sequence context as a determinant of the quantity and chemistry of guanine oxidation produced by hydroxyl radicals and one-electron oxidants

Y. Margolin, V. Shafirovich, N.E. Geacintov and P.C. Dedon

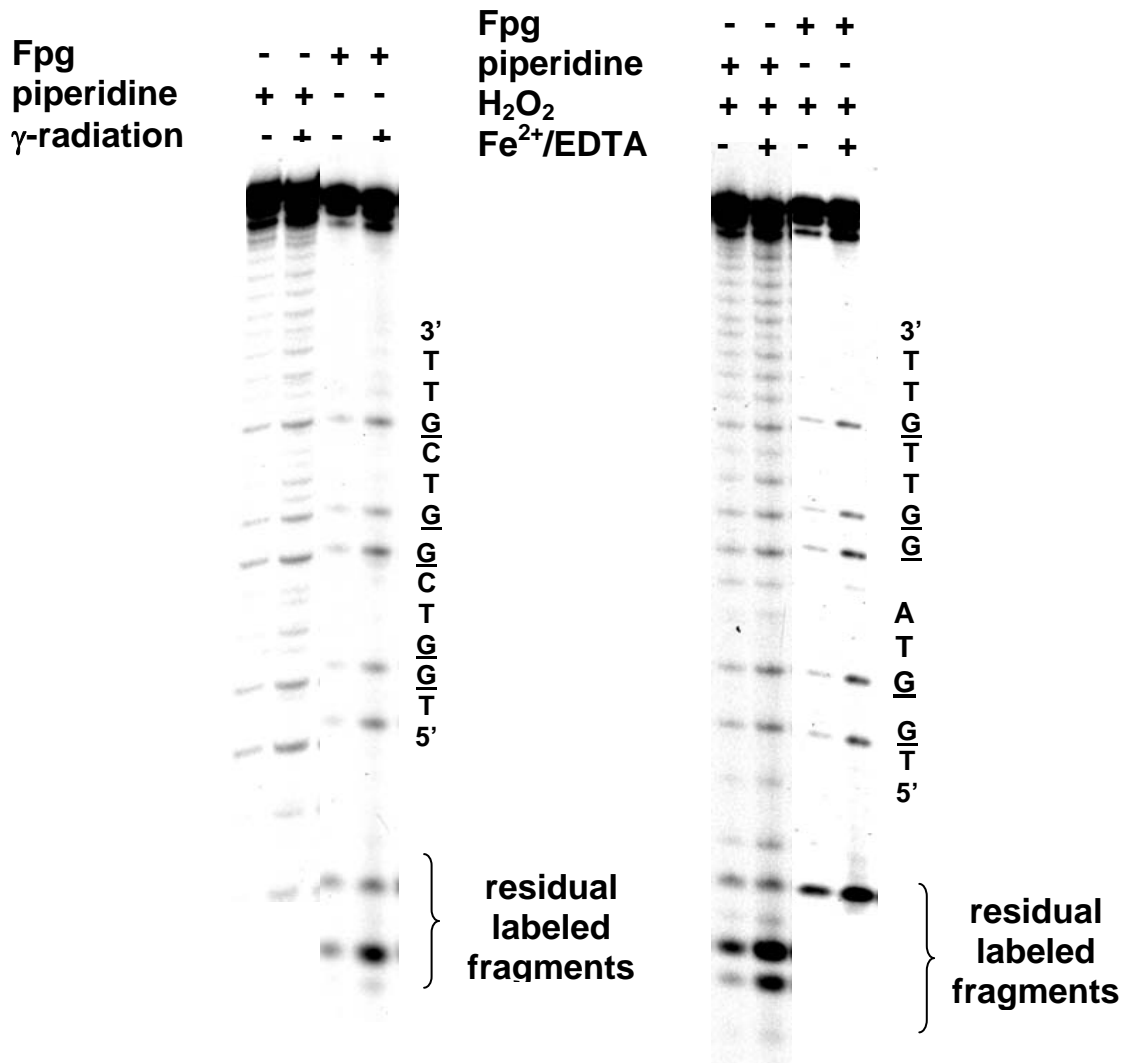

Figure 1. Representative lanes of the sequencing gels used for quantitative analysis of sequence-selective guanine damage caused by  $Fe^{+2}$ -EDTA/ $H_2O_2$  and  $\gamma$ -radiation (see Materials and Methods and main text).
